# Supplementary material
Source: Research Square preprint supplement (doi:10.21203/rs.3.rs-9935359/v1)
Supplement: Supplementary file 1 [file 7755199cef6a8c7dfa7d26d6.docx]

# Supplementary Figure 1


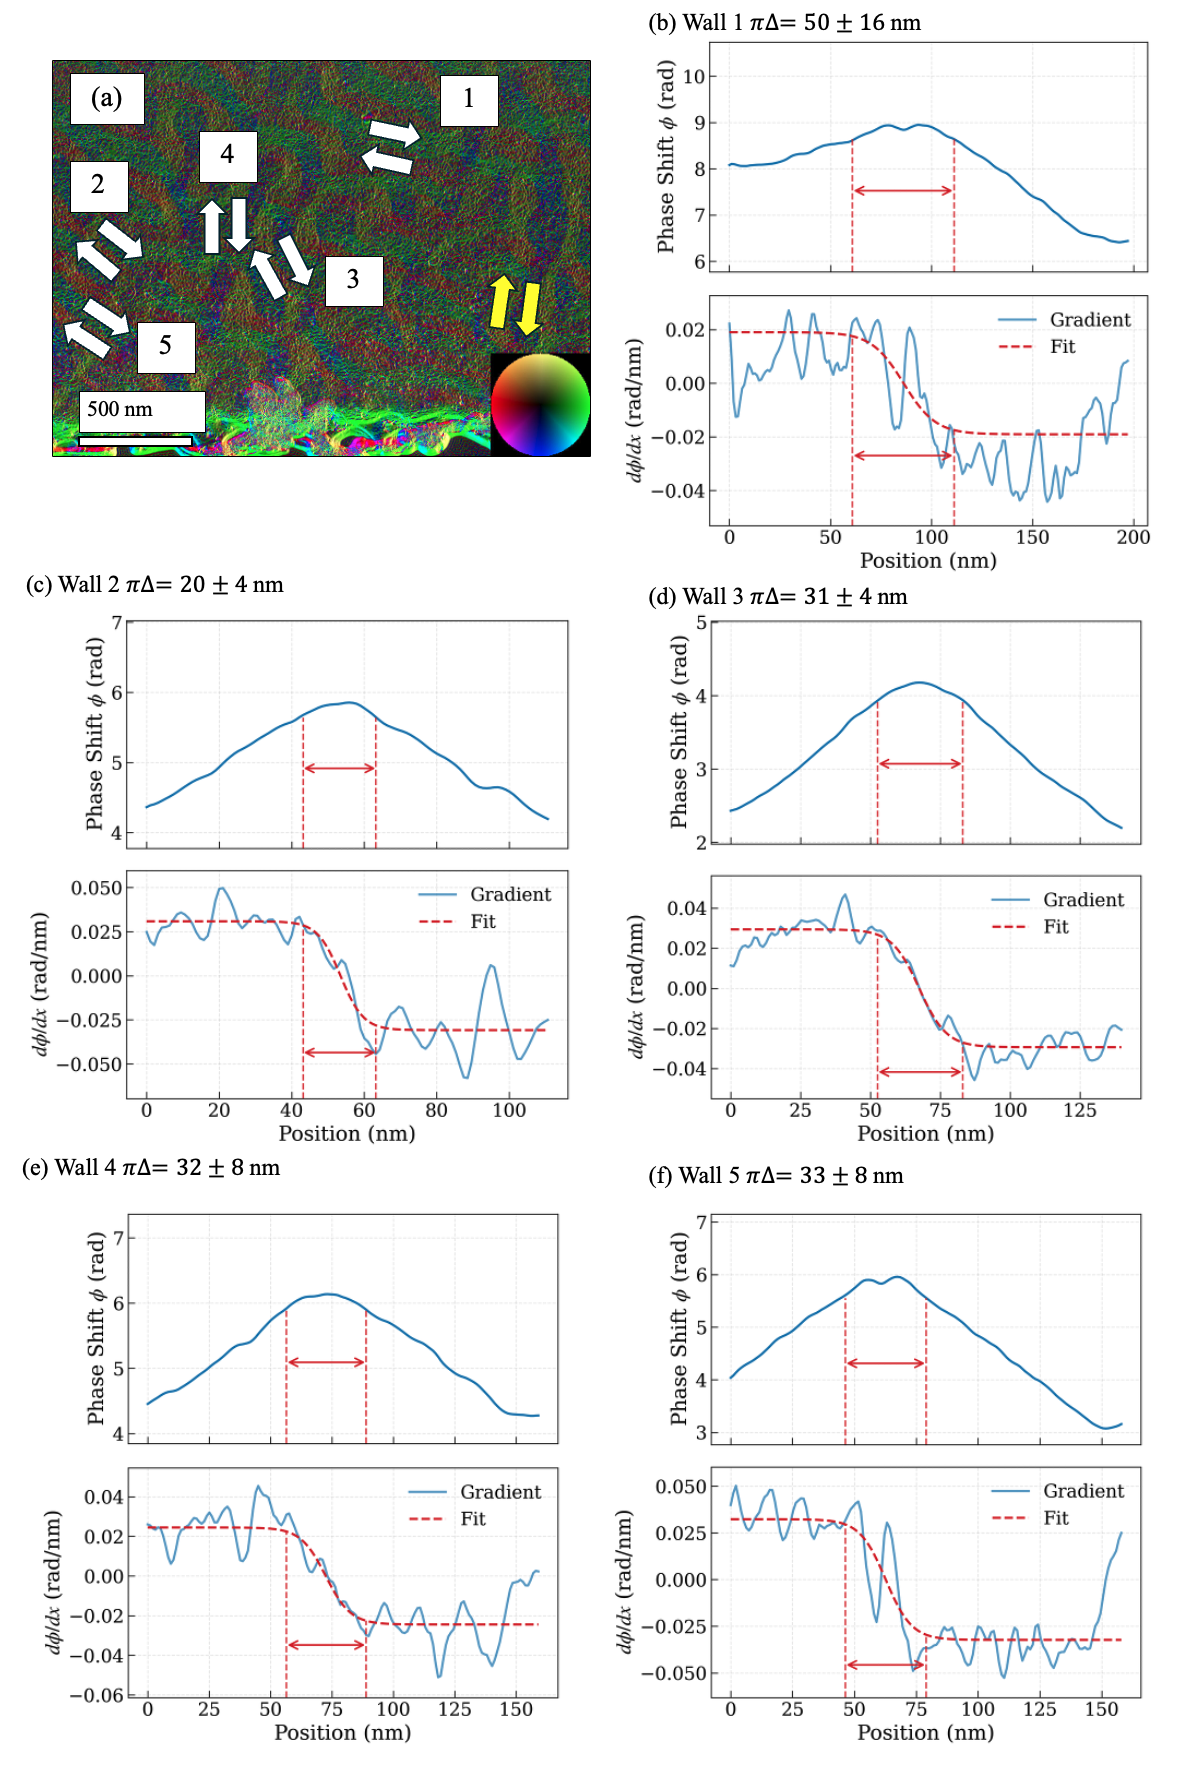


Supplementary Figure 1 – (a) Induction map in vector map representation with white arrows depicting the 180-degree domain walls identified and analyzed in this work. Each of the walls was analyzed in (b-f). The yellow arrow depicts the domain wall analyzed in the main text.

# Supplementary Figure 2


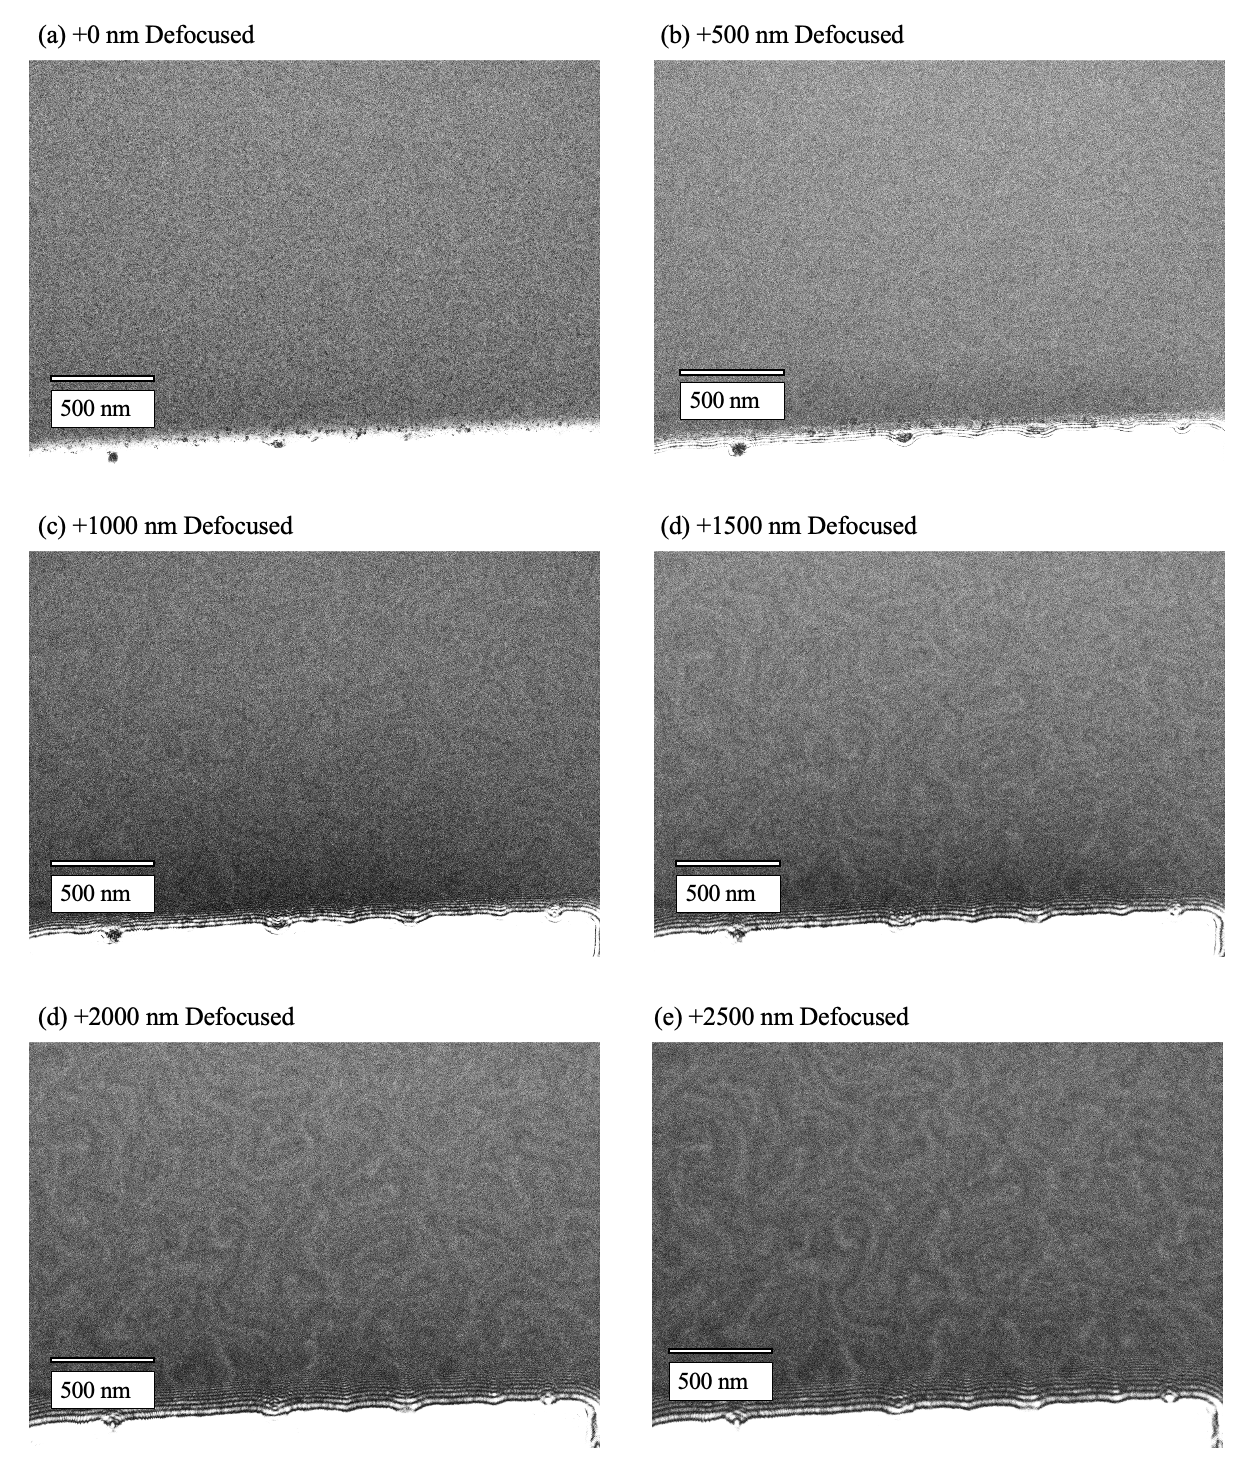


Supplementary Figure 2 – (a-e) Lorentz-TEM image analyzed for domain wall width in this study, taken at 0 to +2500 nm defocused.
